# Supplementary material
Source: MDPI journal article supplement (https://www.mdpi.com/1422-0067/18/7/1378)
Supplement: s1 [file s1]

Archive with 2 entries (2 files):
- ijms-202411-supplementary tables.pdf
- ijms-202411-supplymentary figures-correction.pdf
