# Supplementary material for: Multiple Isoforms of ANRIL in Melanoma Cells: Structural Complexity Suggests Variations in Processing
Source: MDPI journal article supplement (doi:10.3390/ijms18071378), 2017-06-27
Supplement: s1 [file s1 › ijms-202411-supplementary tables.pdf]

**Table S1.** List of primers used.

| Primer set                                                                 | Sequence (5'–3')        | Target                   |
|----------------------------------------------------------------------------|-------------------------|--------------------------|
| <i>ANRIL</i>                                                               |                         |                          |
| 1F                                                                         | CCCTGTCGAGGAACAGCTAA    | Exon 4 – 5               |
| 1R                                                                         | ATCTGGTGGCCAGAAAACAG    |                          |
| 2F                                                                         | TACATCCGTCACCTGACACG    | Exon 1                   |
| 2R                                                                         | CCTCGCTTTCCTTCTTCCT     |                          |
| 3F                                                                         | GCCTCATTCTGATTCAACAGC   | Exon 5-6                 |
| 3R                                                                         | GACTCGGGAAAGGATTCCAG    |                          |
| 4F                                                                         | AACCGGGGAGATCTATTTGG    | Exon 6-7                 |
| 4R                                                                         | GGTGTGGTGTCTCACACCTG    |                          |
| 5F                                                                         | TTTCCTACGAAGCTGGGTGA    | Exon 13b (Short isoform) |
| 5R                                                                         | AAACCCAACAAGATAGAGAAGCA |                          |
| 6F                                                                         | TGCTTACCTAGTGCCAGATGC   | Exon 19 (Long isoform)   |
| 6R                                                                         | TCAAATCCCAGCCAATTACC    |                          |
| Circular <i>ANRIL</i> exon 14 – exon 5 junction and outward facing primers |                         |                          |
| 7F                                                                         | AGTGGCAGGAATTTGGGAA     | Exon 14-5                |
| 7R                                                                         | ATCTGGTGGCCAGAAAACA     |                          |
| Exon 2-F                                                                   | GTTAGGGTGTGGTATGTGC     | Exon 2                   |
| Exon 2-R                                                                   | GAGAGGAGCTGAGGAATCA     |                          |
| Exon 4-F                                                                   | GACTACCTGCCTGCCCTGT     | Exon 4                   |
| Exon 4-R                                                                   | TATTTAACTTCTCTCTTTCT    |                          |
| Exon 6-F                                                                   | AATGTATCTAACTCCAAAG     | Exon 6                   |
| Exon 6-R                                                                   | CACACCTAACAGTGATGCT     |                          |
| Exon 7-F                                                                   | CCCGGCGGATAGAGAGAAT     | Exon 7                   |
| Exon 7-R                                                                   | ACACCTGTAATCCCAGCAC     |                          |
| Exon 8-F                                                                   | TGGGAATTCTGGGAGAAAC     | Exon 8                   |
| Exon 8-R                                                                   | CCTCCCACCATGATTCTGA     |                          |
| Exon 14-F                                                                  | GGGGCCATTCATATGAGAG     | Exon 14                  |
| Exon 14-R                                                                  | ATCACTGTGCTCCTCATTCC    |                          |
| Exon 16-F                                                                  | TACACACTTGAAGATGGTG     | Exon 16                  |
| Exon 16-R                                                                  | CTATTGCATTTGATCTTACG    |                          |

**Table S2.** Back-spliced junction prediction for reverse complementary intron pairs (can possibly go with Figure 5C).

| Reverse complementary intron pairs | Predicted back-splicing events |
|------------------------------------|--------------------------------|
| 14-1                               | 14-2                           |
| 12-1                               | 12-2                           |
| 11-1                               | 11-2                           |
| 11-6                               | 11-7                           |
| 11-7                               | 11-8                           |
| 6-1                                | 6-2                            |
| 7-6                                | 7-7                            |
| 7-5                                | 7-6                            |
| 5-1                                | 5-2                            |

**Table S3.** Back-spliced junctions validated in melanoma cells due to possible pairing of inverted Alu repeats in introns flanking either sides of back-spliced exons.

| <b>Backsplicing</b> | <b>Intron_1</b> | <b>Intron_2</b> | <b>Alu in intron_1</b> | <b>Alu in intron_2</b> |
|---------------------|-----------------|-----------------|------------------------|------------------------|
| 2-6                 | 1               | 6               | Chr9:22007076-22007388 | Chr9:22054786-22055051 |
| 2-6                 | 1               | 6               | Chr9:22017143-22017337 | Chr9:22054786-22055051 |
| 2-6                 | 1               | 6               | Chr9:22017143-22017337 | Chr9:22056234-22056365 |
| 2-6                 | 1               | 6               | Chr9:22018051-22018262 | Chr9:22054786-22055051 |
| 2-6                 | 1               | 6               | Chr9:22018374-22018669 | Chr9:22054786-22055051 |
| 2-6                 | 1               | 6               | Chr9:22023450-22023742 | Chr9:22054786-22055051 |
| 6-7                 | 5               | 7               | Chr9:22047778-22048093 | Chr9:22057525-22057818 |
